# Supplementary material for: A LiAlO2/nitrogen-doped hollow carbon spheres (NdHCSs) modified separator for advanced lithium–sulfur batteries
Source: Royal Society of Chemistry journal article supplement (doi:10.1039/c7ra10367k), 2018-01-01
Supplement: c7ra10367k1.pdf [file c7ra10367k1.pdf]

## Electronic Supplementary Information

### LiAlO<sub>2</sub>/Nitrogen-doped Hollow Carbon Spheres (NdHCSs) Modified Separator for Advanced Lithium-Sulfur Batteries †

Fanqun Li <sup>a</sup>, Furong Qin <sup>a</sup>, Guanchao Wang <sup>a</sup>, Kai Zhang <sup>a</sup>, Peng Wang <sup>a</sup>, Zhian Zhang <sup>a</sup> and Yanqing Lai <sup>a, \*</sup>

<sup>a</sup> School of Metallurgy and Environment, Central South University, Changsha 410083, China

\* Corresponding author: laiyanqingcsu@163.com

#### Supporting Figures

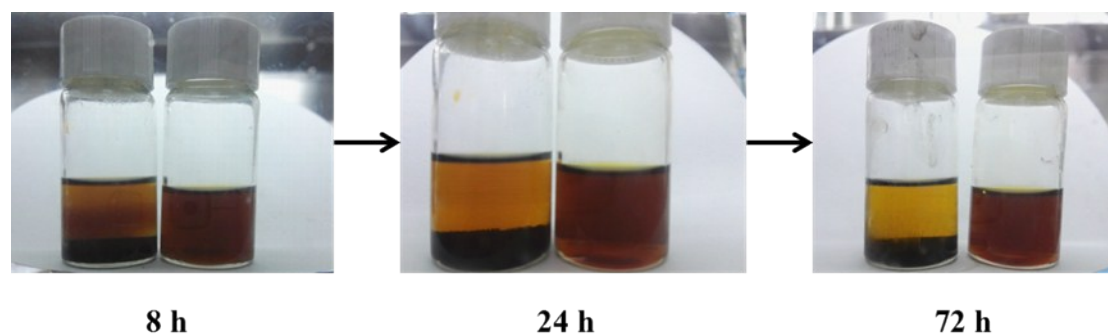

Figure S1. Colour change of the electrolyte with NdHCSs (left) .

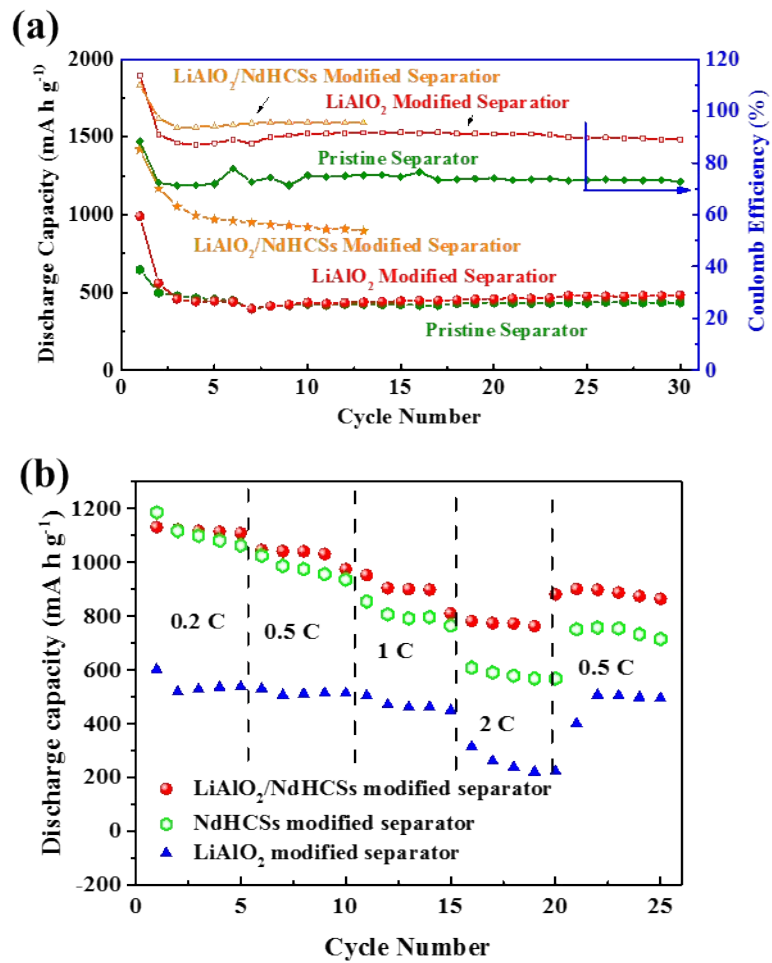

Figure S2. Cycle performance (a) and rate performance (b) of cell with different separator.
